# Supplementary material
Source: Springer Nature journal article supplement (https://www.springermedizin.de/resource/supplementary/12950_2009_156_MOESM2_ESM.pdf/9558080)
Supplement: MOESM2 [file 9558080]

**Neg ctrl**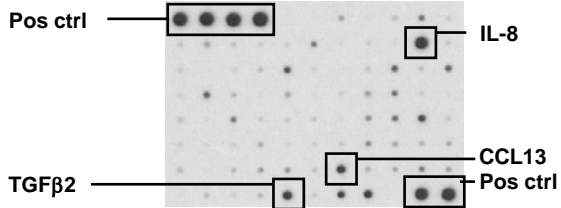**LPS**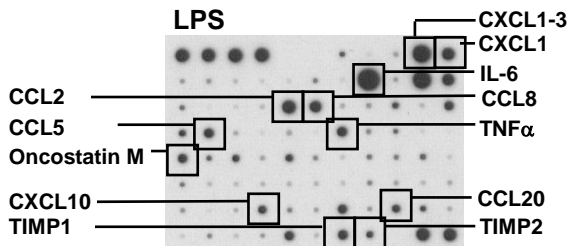**Cocktail 5**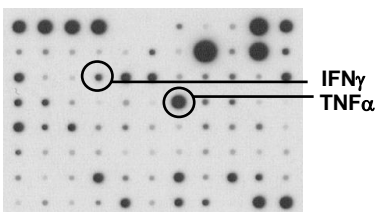**Cocktail 6**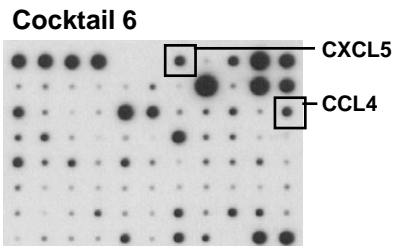**Cocktail 1**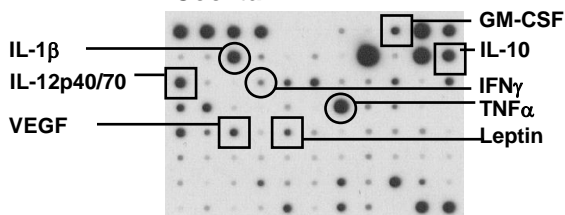**Cocktail 7**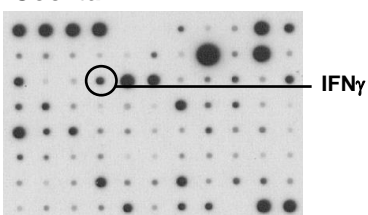**Cocktail 2**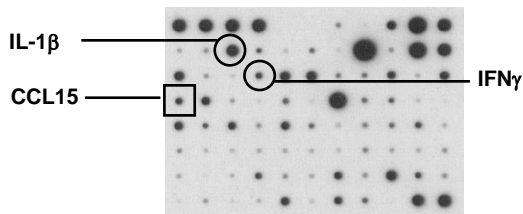**Cocktail 8**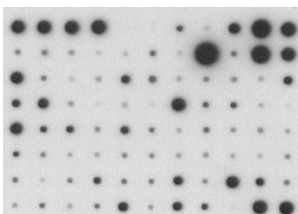**Cocktail 3**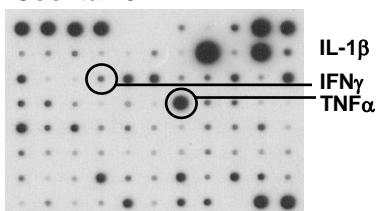**Cocktail 9**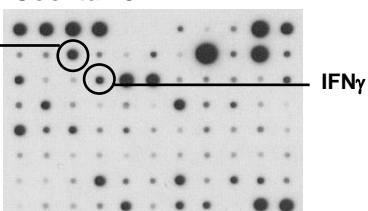**Cocktail 4**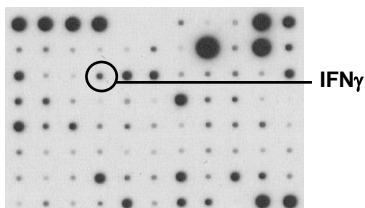

□ Cytokine or chemokine induced by the cocktail

○ Cytokine added as part of the cocktail
